# Supplementary material
Source: PubMed Central journal article supplement (PMC2825599)
Supplement: 97320630004134S1.pdf [file 97320630004134S1.pdf]

**Supplementary material**

Equation 1:

$$Specificity = \min_{1 \leq i \leq c} \operatorname{sgn}(-m_X m_{Y_i}) \frac{\log s_X}{\log s_{Y_i}}$$

where  $\operatorname{sgn}(\bullet)$  is the sign function:  $\operatorname{sgn}(m)=1$  if  $m>0$ ,  $\operatorname{sgn}(m)=-1$  if  $m<0$  and  $\operatorname{sgn}(m)=0$  when  $m=0$ ,  $S_X$  and  $S_{Y_i}$  are the standard deviations of the discretized values for the module  $X$  and the modules  $Y_i$  respectively, and  $m_X$  and  $m_{Y_i}$  are the mean values of the discretized values for the module  $X$  and the modules  $Y_i$  respectively. The above expression means that the specificity of the module  $X$  is defined as the similarity to a module  $Y_i$  with the nearest expression pattern to the module  $X$ . Thus, the larger specificity is, the larger expression difference from another class is. The specificity calculation is performed for every constant module  $X$  in class A, and then these modules are ranked in descending order of their specificities. The specificity calculation in class B is performed in the same manner as class A. Finally, a set of discriminative modules in each class is obtained by setting a threshold to the rank orders of the specificities.
